# Supplementary material
Source: PubMed Central journal article supplement (PMC5659698)
Supplement: en.2017-00168.sf1.pdf [file en.2017-00168.sf1.pdf]

## Supplementary Figure 1

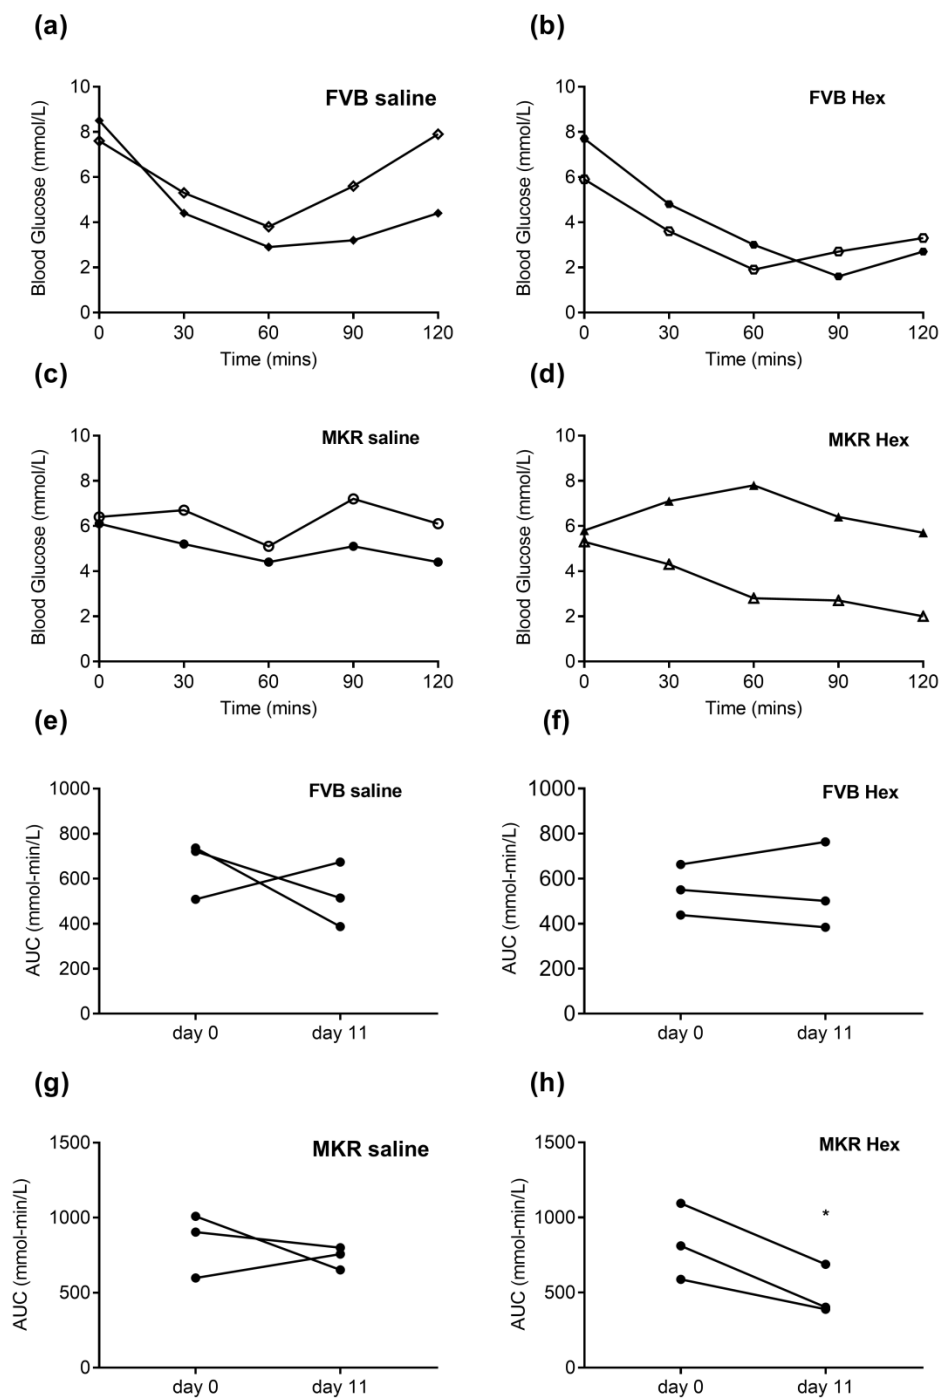

**Supplementary Figure 1.** Representative graphs of ITT data from the same mice before start of treatment (black symbols) and at day 11 of the treatment (open symbols) of FVB saline (a), FVB Hex (b), MKR saline (c) and MKR Hex (d). Self-comparison analysis between area under the curve (AUC) of ITT data before and at day 11 of the treatment from FVB saline group (e), FVB Hex group (f), MKR saline group (g) and MKR Hex group (h).  $n=3/\text{group}$ . \* $P<0.05$  vs. MKR Hex before treatment.
